# Supplementary material for: Acetylation-Mimic Mutation of TRIM28-Lys304 to Gln Attenuates the Interaction with KRAB-Zinc-Finger Proteins and Affects Gene Expression in Leukemic K562 Cells
Source: MDPI journal article supplement (doi:10.3390/ijms24129830), 2023-06-06
Supplement: s1 [file s1]

## **Supporting information**

**Figure S1-S4**

**Table S1-S5**

**Figure S1**

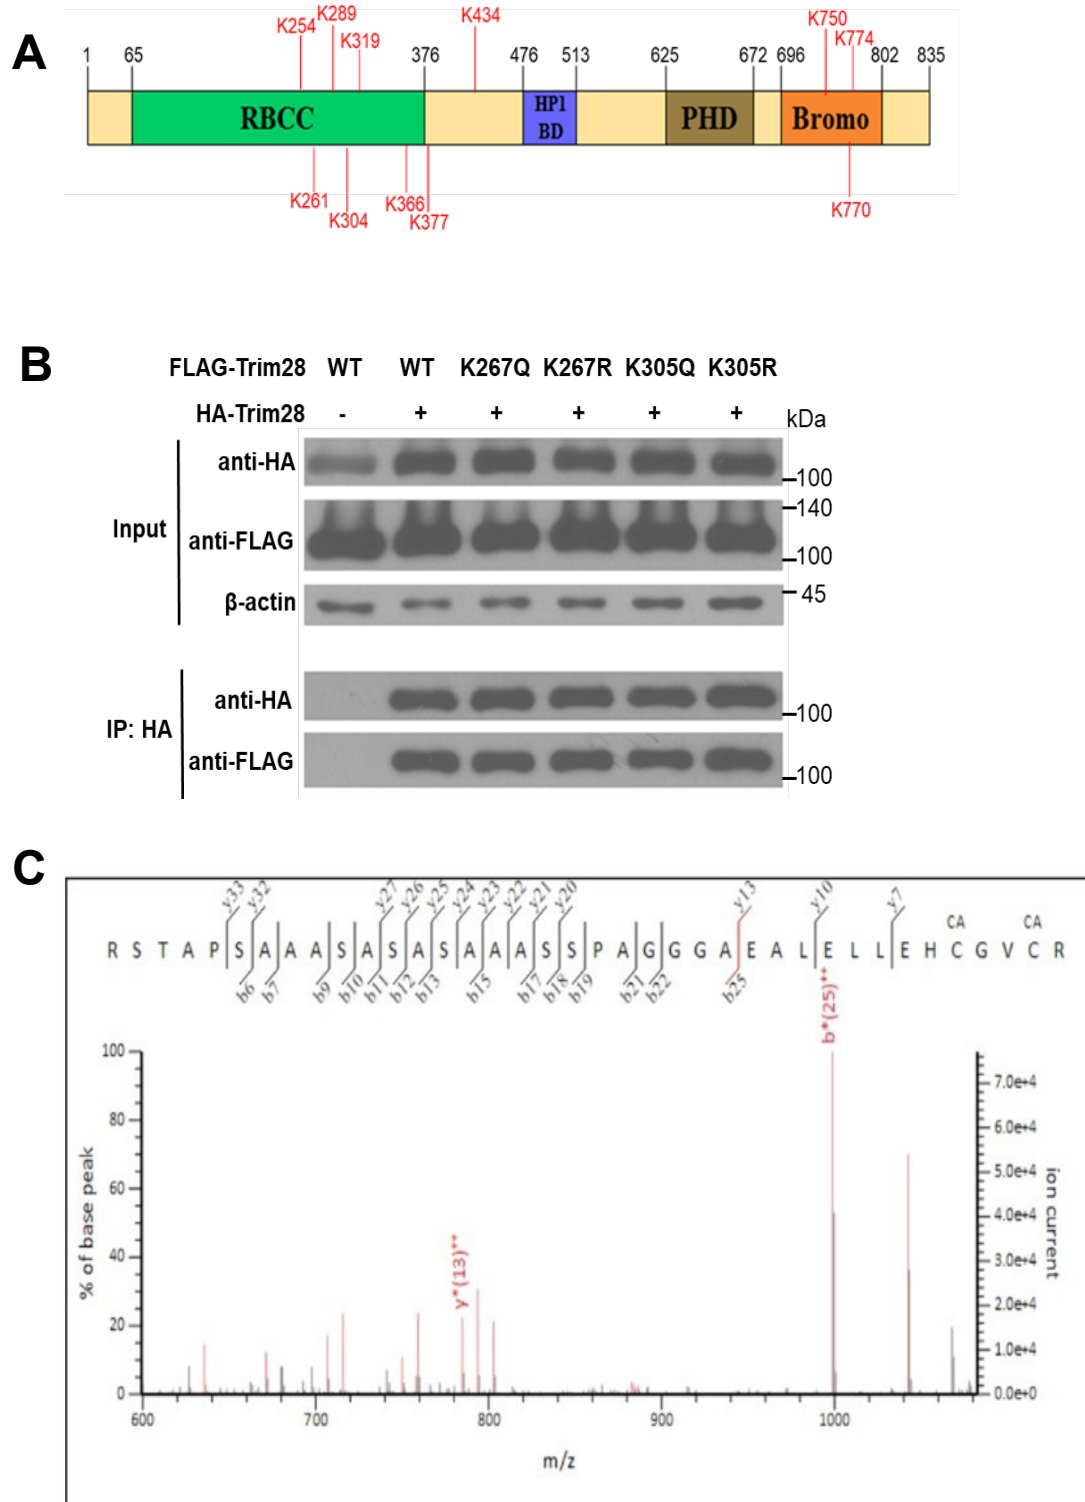

**Figure S1 Trim28 acetylation and dimerization.** (A) Identification of TRIM28 acetylated residues in K562 cells. Extracts of K562 cells were immunoprecipitated with anti-TRIM28-N followed by SDS-PAGE and LC-MS/MS analysis. The detected acetylated lysines are shown in red. (B) Trim28-K305Q associates with wild-type TRIM28. Co-IP of HA-Trim28 with FLAG-tagged mouse Trim28 wild-type (WT), K267Q, K267R, K305Q, or K305R. These constructs were overexpressed in 293T cells as indicated, and protein complexes were pulled down by HA-Sepharose and detected with anti-FLAG or anti-HA. (C) MS analysis of human TRIM28. Mouse FLAG-Trim28-K305Q was overexpressed in 293T cells (human embryonic kidney) and purified by using FLAG-agarose beads for LC-MC/MC. A unique peptide from amino acids 32-69 of human TRIM28 was identified, as indicated by the sequence shown at the top.

Figure S2

A

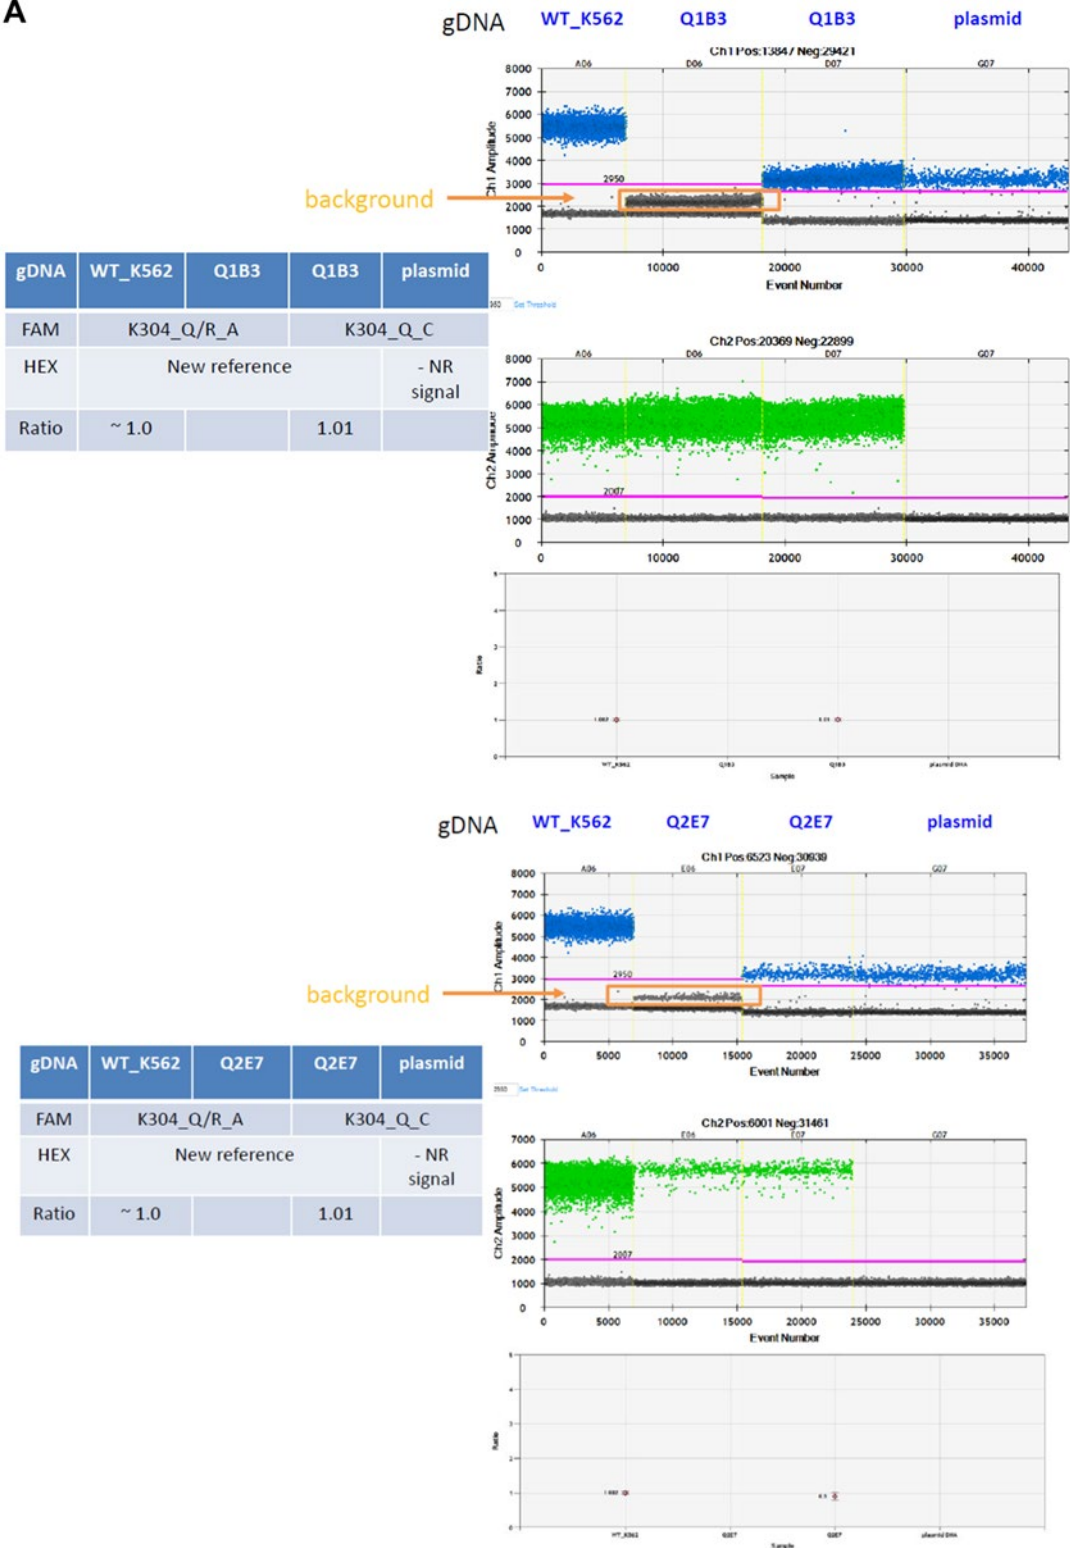

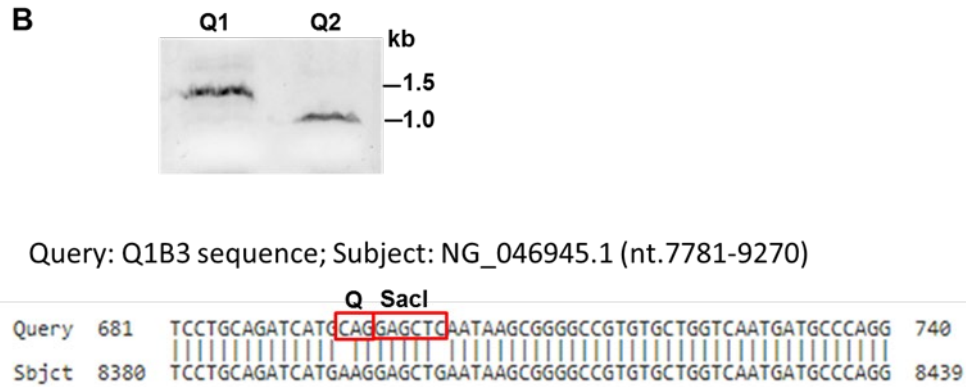

**Figure S2 *TRIM28*-K304Q KI cell analysis.** (A) Quantitative Droplet Digital PCR (ddPCR) confirmed knock-in. There were 50 clones subjected to SacI digestion, and 5 clones to ddPCR analysis. The FAM-labeled probes were designed to perfectly complement the wild type K304 sequence (K304\_Q/R\_A) or capable of binding to K304Q (K304\_Q\_C). The HEX-labeled probe recognized other genome sequence outside K304 region as a reference. The results showed that both Q1B3 (indicated Q1 later) and Q2E7 (indicated Q2 later) successfully K304Q knocked-in in three alleles. (B) DNA Sequencing confirmed K304Q knock-in. A 1490 bp region of *TRIM28*, containing the Cas9-RNP targeting site, were PCR amplified by using the *TRIM28* gDNA primer set (forward 5'– 7781 CTCTACATCTTCCCAATAAATGGCCCAGTG – 3', and reverse 5'– 9270 TGTGAACAAAGCAGAACCCTCTGCCTCAGT – 3'). The PCR fragments from Q1 or Q2 clone were separated on agarose gel and ligated into TA vector for Sanger sequencing. Q1B3 displayed correct size from 7780 to 9270 and mutated sequences (K304Q and SacI site) but Q2E7 was incorrect size from 7780 to 8550.

**Figure S3**

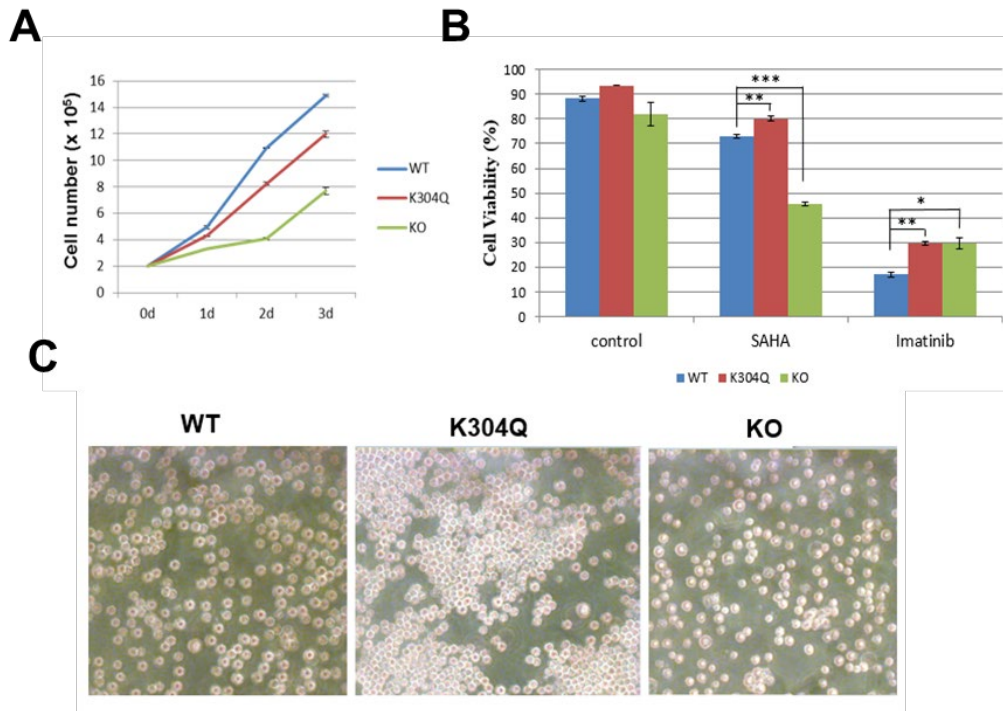

**Figure S3. Comparison of phenotypes between wild-type, *TRIM28*-K304Q KI and *TRIM28*- KO K562 cells.** (A) Cell proliferation analysis. Wild-type (WT), *TRIM28*-K304Q and *TRIM28*-KO K562 cells were seeded as  $2 \times 10^5$ /ml and cultured for 1d, 2d, and 3d. The cell number was determined with trypan blue stain and calculated with automatic cell counter. (B) Drug sensitivity analysis. The cells were treated with a HDAC inhibitors SAHA (2  $\mu$ M) or Imatinib (2  $\mu$ M) as indicated for 72 h and cell viability were analyzed by trypan blue staining and automatic cell counter. (C) *TRIM28*-K304Q cells were more attachable than wild-type and KO cells.

**Figure S4**

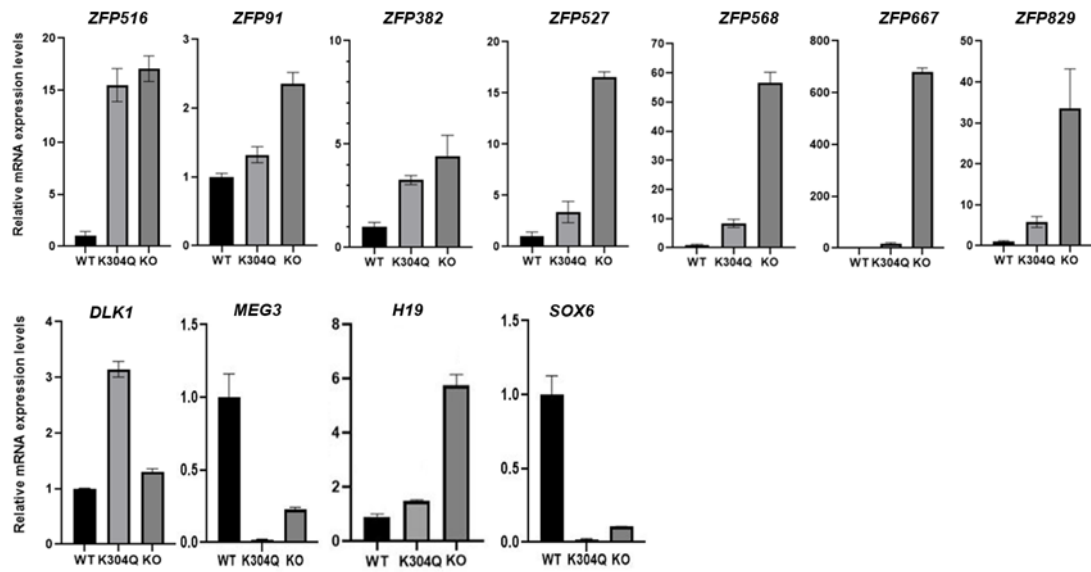

**Figure S4 RNA-seq verification.** RT-qPCR assays verified the identity of certain ZNFs, imprinting genes, and *SOX6* in WT, *TRIM28*-K304Q KI and *TRIM28*-KO cells.

## **Table S1**

**The differential gene expression between wild-type and  
*TRIM28*-K304Q KI cells (excel file)**



**Table S2A and S2B**

**IP-MS analysis of the associated proteins of wild-type- and  
K304Q-TRIM28 (excel files)**

**Table S3A Proteins specifically interacted with wild-type TRIM28**

|                        |                                                                                                                                 |
|------------------------|---------------------------------------------------------------------------------------------------------------------------------|
| Epigenetic regulators  | EHMT1, EHMT2                                                                                                                    |
| Protein ubiquitination | CTLH complex: RANBP9, WDA26, GID8, MAEA, RBP10, ARMC8, RMD5A, RMD5B, MKLN1, YPEL5, GID4<br>MAGE family: MAGEC2, MAGEA9<br>UBP2L |
| RNA modification       | YTHD2, ZCCHC4, FBRL                                                                                                             |
| RNA degradation        | NEXT(nuclear exosome target): MTREX, (ZCCHC8: K304Q), RBM7<br>Decapping : EDC4                                                  |
| Translation regulation | GCN1,                                                                                                                           |
| Metabolism             | G3PD                                                                                                                            |

**Table S3B Proteins interacted with wild-type and K304Q TRIM28**

|                                     |                                                                                |
|-------------------------------------|--------------------------------------------------------------------------------|
| Heterochromatin proteins            | CBX5, CBX3, CBX1<br>CENPV (centromere protein V)                               |
| Histones                            | H4, H2B2F, H2B1B, (H3.1 and H2A1B:K304Q)<br>(H2A1D, H2AV and H3.3: WT)         |
| RNA binding and processing proteins | hnRNP M, hnRNP H, hnRNP F<br>PABP1, PABP4<br>REXO5 (RNA exonuclease 5)<br>DHX9 |
| Transcription factor                | GATA1                                                                          |
| Iron metabolism                     | HBE, TFR1 (Transferrin receptor protein 1)                                     |

## Table S4

The phosphorylated residues in wild-type- and K304Q-TRIM28

| WT                                            | K304Q                        |                                            |
|-----------------------------------------------|------------------------------|--------------------------------------------|
| phosphorylated residues                       | phosphorylated residues      | peptide sequence                           |
| S19                                           | S19                          | AASAAAASAAAAASAASGSPGPGEGSAGGEKR           |
| S50,S51                                       | S50, S51                     | RSTAPSAASASASAAAASSPAGGGAEALELLEHCGVCR     |
| T113                                          |                              | LLPCLHSACSACLGPAAPAAANSSGDGGAAGDGTVVDCPVCK |
| S138                                          |                              | DIVENYFMRDSSGSK                            |
| S258                                          | S258                         | LLASLVK                                    |
| S350                                          | S350                         | FASWALESDNNTALLSK                          |
| S437, S439, S440                              | S437, S440                   | QGSQSQPMEVQEGYGFGSGDDPYSSAEPHVSGVK         |
| S473                                          | S473                         | SRSGEGEVSGLMR                              |
| S489, S501                                    | S489, S501                   | VSLERLDLTLTADSQPPVFK                       |
| T531, T541                                    | T531, T536, T541             | GAAAAATGQPGTAPAGTPGAPPLAGMAIVK             |
| S594, S596, S598,T599, S600, S601, T611, S612 | S594, T599, S600, S601, S612 | LASPSGSTSSGLEVVVAPEGTSAPGGGPGTLLDSDATICR   |
| S681, S683                                    | S681, S683                   | EEDGSLSLDGADSTGVVAK                        |
| S697                                          | S697                         | EEDGSLSLDGADSTGVVAKLSPANQR                 |
| S752,S756, S757                               | S752,S756, S757              | LQEKLSPPYSSPQEFQDVGR                       |
| S824, S828                                    | S824, S828                   | FSAVLVEPPPMSLPGAGLSSQELSGGPGDGP            |

The red residues indicate phosphorylation in both wild-type and K304Q TRIM28; the green residues indicate phosphorylation only in wild-type TRIM28. The T536 phosphorylation only detected in TRIM28-K304Q, showed in blue type.

**Table S5 Primers for site-directed mutagenesis and qPCR**

| A. Primers for mouse Trim28 site-directed mutagenesis |                            |                           |
|-------------------------------------------------------|----------------------------|---------------------------|
| Name                                                  | Forward (5'-3')            | Reverse (5'-3')           |
| K255Q                                                 | GAACCAACGTCAACTCTTGGCTTC   | CTCACTGCATCTTCCAAAAAC     |
| K255R                                                 | GAACCAACGTAGACTCTTGGC TTC  | CTCACTGCATCTTCCAAAAAC     |
| K267Q                                                 | GTCTTGGGGACCAACATGCCACAC   | GTTTCACCAGTGAAGCCAAG      |
| K267R                                                 | GTCTTGGGGACAGACATGCCACAC   | GTTTCACCAGTGAAGCCAAG      |
| K290Q                                                 | CTGATGTGCAGCAGCGAGTGCAGG   | ACACCTGGCGGATCGAGCTTC     |
| K290R                                                 | CTGATGTGCAGAGGCGAGTGCAGG   | ACACCTGGCGGATCGAGCTTC     |
| K305Q                                                 | CTGCAGATCATGCAGGAGCTGAATAA | AATGGCCATCTTGACATCAAC     |
| K305R                                                 | CTGCAGATCATGAGGGAGCTGAATAA | AATGGCCATCTTGACATCAAC     |
| K341Q                                                 | CAAAATTTCAGAGGCACCAGGAAC   | GACATGGTCCAGTGCTGGCG      |
| K341R                                                 | CAAAATTTCAGCAGCACCAGGAAC   | GACATGGTCCAGTGCTGGCG      |
| R310Q                                                 | CTGAATAAGCAGGGTCGAGTTCTG   | CTCCTTCATGATCTGCAG        |
| Primers for human TRIM28 site-directed mutagenesis    |                            |                           |
| Name                                                  | Forward (5'-3')            | Reverse (5'-3')           |
| K304Q                                                 | GCAGATCATGCAGGAGCTGAATAAG  | AGGATGGCCATCTTGACA        |
| K304R                                                 | GCAGATCATGAGGGAGCTGAATAAG  | AGGATGGCCATCTTGACA        |
| B. qPCR primer sequences                              |                            |                           |
| Gene                                                  | Forward (5'-3')            | Reverse (5'-3')           |
| ZNF516                                                | GCACACTCAGTGGTGTTTGAG      | GGACATCGTGAGGGTACTGC      |
| ZNF667                                                | TGTGACAAGTTCTTCAGGCG       | GGATGAATGCCGATTGCAGAC     |
| ZNF382                                                | CCTGCTCAGAAGGCGCTTTACA     | CTCTGTGTCCATAGCTCTTCTCC   |
| ZNF568                                                | AAGAGTCTGCCCTTTCCGAGGA     | GCAGGTTTCATTTGCTCCCACTC   |
| ZNF829                                                | ATGGGAATGCCTGGACGCTGAT     | CCAGGGCTCTTTTCCTTGTTCC    |
| ZNF527                                                | GAGTGGGAATGGCTGAAGCCAT     | CCAGTAAGGAGATCATGTTGGGC   |
| ZNF91                                                 | AGGAGTGGCAATGTCTGGACAC     | CAGGGCTCTTTTCCTTGCTCCA    |
| ZNF445                                                | AGCTCCAGGAGACCATGACT       | GAATGGTCCCACCAGGGAAG      |
| H19                                                   | TGCTGCACTTTACAACCACTG      | ATGGTGTCTTTGATGTTGGGC     |
| IGF2                                                  | GGGCAAGTTCTTCCAATATGA      | TCACTTCCGATTGCTGGC        |
| PEG3                                                  | CGGAACAGAAGAGAGTCCTCAC     | TGCTTCTTGGGTTCCCTGGTGTG   |
| MEG3                                                  | TTTTGTGCCCAAGGCTCCTGGA     | AGGGACTCAAGGAGCCAGGTTA    |
| DLK1                                                  | GCACTGTGGGTATCGTCTTCC      | CTCCCCGCTGTTGTACTGAA      |
| ITGB3                                                 | AGAGCCAGAGTGTCCCAAG        | GGCCTCTTTATACAGTGGGTTGT   |
| HBG(1/2)                                              | TGGATGATCTCAAGGGCAC        | TCAGTGGTATCTGGAGGACA      |
| HBE1                                                  | GCAAGAAGGTGCTGACTTCC       | ACCATCACGTTACCCAGGAG      |
| SOX6                                                  | CGGTCTACCTACTGGGATAA       | GCTTTTGTTTGGCAGATTGA      |
| IKZF2                                                 | ACACTCTGGAGAGAAGCCGTTT     | CCAGTGAAGTGCAGCTGCTTGTA   |
| TRIM28                                                | AAGGACCATACTGTGCGCTCTAC    | ACGTTGCAATAGACAGTACGTTTAC |
| GAPDH                                                 | CAACAGCGACACCCACTCCT       | CACCCTGTTGCTGTAGCCAAA     |
| ACTIN                                                 | GCACCAGGGCGTGATGG          | GCCTCGGTCAGCAGCA          |

| C. ChIP primer sequences |                          |                          |
|--------------------------|--------------------------|--------------------------|
| Name                     | Forward (5'-3')          | Reverse (5'-3')          |
| H19 promoter             | CACGCTCAGGGATCATCACG     | TGTGGGCAAATTCACCTCTCC    |
| LINE1 promoter           | GAACGCCACAAAGATACTCC     | CTCTTCTGGCTTGTAGGGTTTCTG |
| LCR-HS3                  | ATAGACCATGAGTAGAGGGCAGAC | TGATCCTGAAAACATAGGAGTCAA |
| ZNF568 3'exon            | GCAACAGGAAACACTTGTGAGG   | AGGGGGTTACAACATAGGATGC   |
| ZNF667 3'exon            | AGTTCTTCAGGCGGCTTTCA     | ATGCCGATTGCAGACCTTCT     |
| ITGB3 promoter           | CCTATCACTGCTTACGCAAGC    | CCGGTAGACTACCTACCTGTT    |
